# Supplementary material for: A facile route to model catalysts: the synthesis of Au@Pd core–shell nanoparticles on γ-Fe2O3 (0001)
Source: Royal Society of Chemistry journal article supplement (doi:10.1039/c3nr03047d), 2013-01-01
Supplement: c3nr03047d.pdf [file c3nr03047d.pdf]

Electronic Supplementary Information for

**A facile route to model catalysts: the synthesis of Au@Pd core shell nanoparticles on  $\gamma$ -Fe<sub>2</sub>O<sub>3</sub> (0001)**

Robert J. Davies,\* Michael Bowker, Philip R. Davies, David J. Morgan

Cardiff Catalysis Institute, School of Chemistry, Cardiff University, Cardiff, CF10 3AT

\*daviesrj11@cf.ac.uk

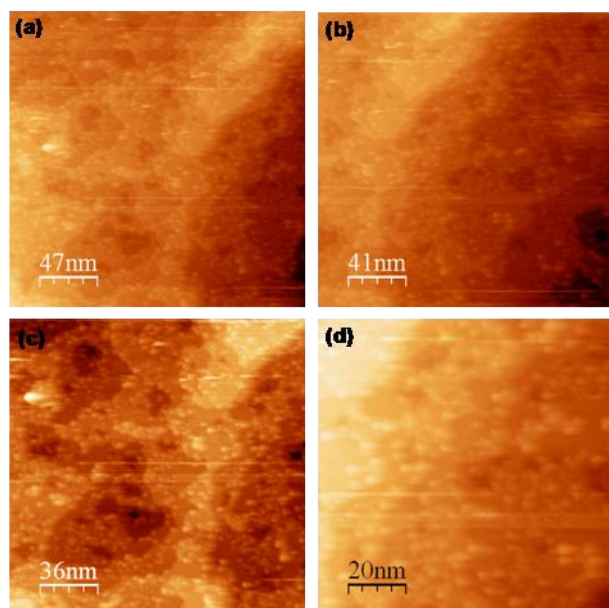

**Fig. SI1** STM images of the  $\gamma$ -Fe<sub>2</sub>O<sub>3</sub> (2×2) surface after deposition of Pd.

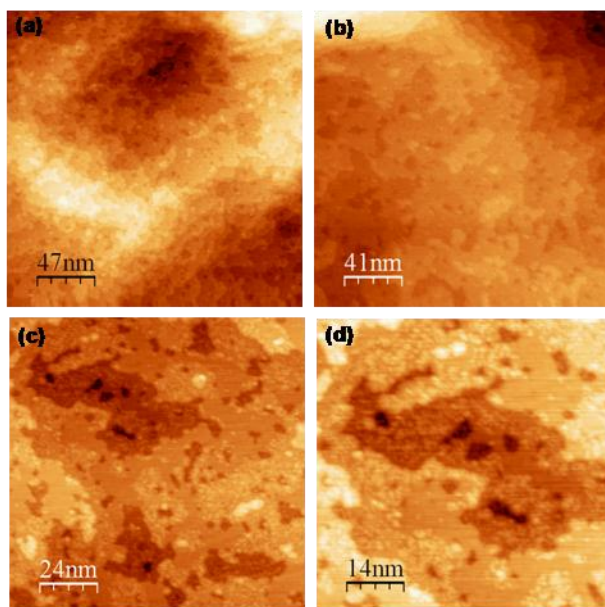

**Fig. SI2** STM images of the  $\gamma$ -Fe<sub>2</sub>O<sub>3</sub> (2×2) surface after deposition of Pd and subsequent heating to 573 K for 1 minute.
